# Supplementary material for: Lethal weapon IL: a nano-copper/tetraalkylphosphonium ionic liquid composite material with potent antibacterial activity
Source: Royal Society of Chemistry journal article supplement (doi:10.1039/d3su00203a), 2023-01-01
Supplement: d3su00203a1.pdf [file d3su00203a1.pdf]

## Supplementary information for

### **Lethal weapon II: A nano-copper/tetraalkylphosphonium ionic liquid composite material with potent antibacterial activity**

Abhinandan Banerjee<sup>\*,a</sup>, Bukola R. Aremu<sup>#,a</sup>, Sima Dehghandokht<sup>#,a</sup>, Rayan Salama<sup>a</sup>,  
Hao Zhou<sup>b</sup>, Sharon M. Lackie<sup>c</sup>, Moutasem Seifi<sup>a</sup>, Pierre Kennepohl<sup>b</sup>, and John F.  
Trant<sup>\*,a,d,e</sup>

<sup>a</sup> Department of Chemistry and Biochemistry, University of Windsor, 401 Sunset Avenue, Windsor, Ontario N9B 3P4, Canada

<sup>b</sup> Department of Chemistry, University of Calgary, 2500 University Drive NW, Calgary, Alberta, Canada T2N 1N4.

<sup>c</sup> Great Lakes Institute for Environmental Research (GLIER), University of Windsor, 2990 Riverside Drive, Windsor, Ontario N9B 3P4, Canada

<sup>d</sup> WeSpark Health Institute, 401 Sunset Avenue, Windsor, Ontario, N9B 3P4, Canada

<sup>e</sup> Binary Star Research Services, LaSalle, Ontario N9J 3X8, Canada

\* Corresponding authors' contact information – email: [john.trant@uwindsor.ca](mailto:john.trant@uwindsor.ca);  
[arb@uwindsor.ca](mailto:arb@uwindsor.ca).

# These two authors contributed equally.

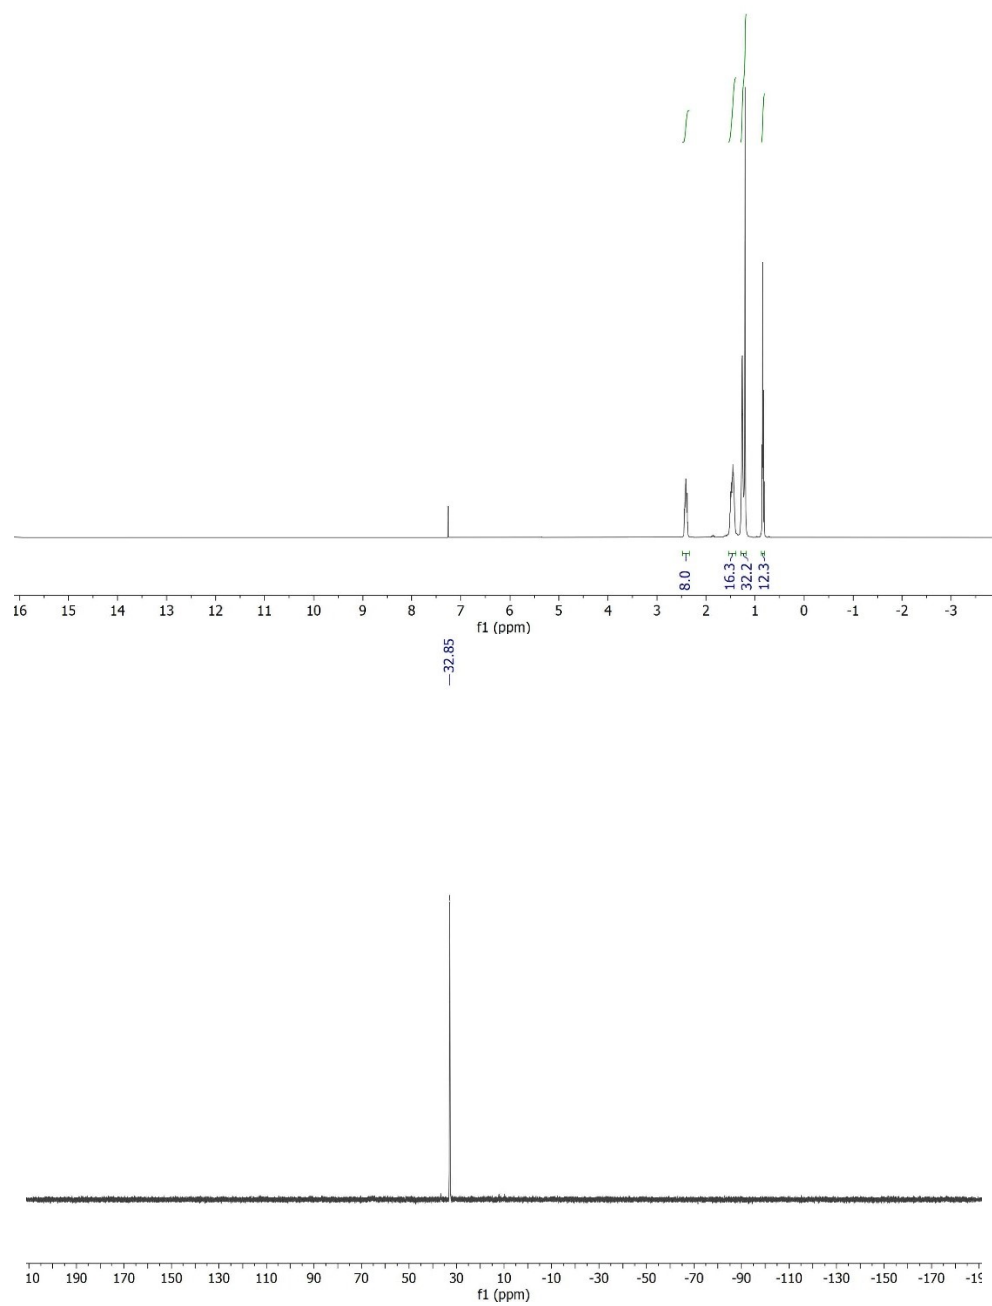

**Fig S1.**  $^1H$  and  $^{31}P$  NMR spectra of TAPIL-1,  $[P(C_6H_{13})_3(C_{14}H_{29})]Cl$

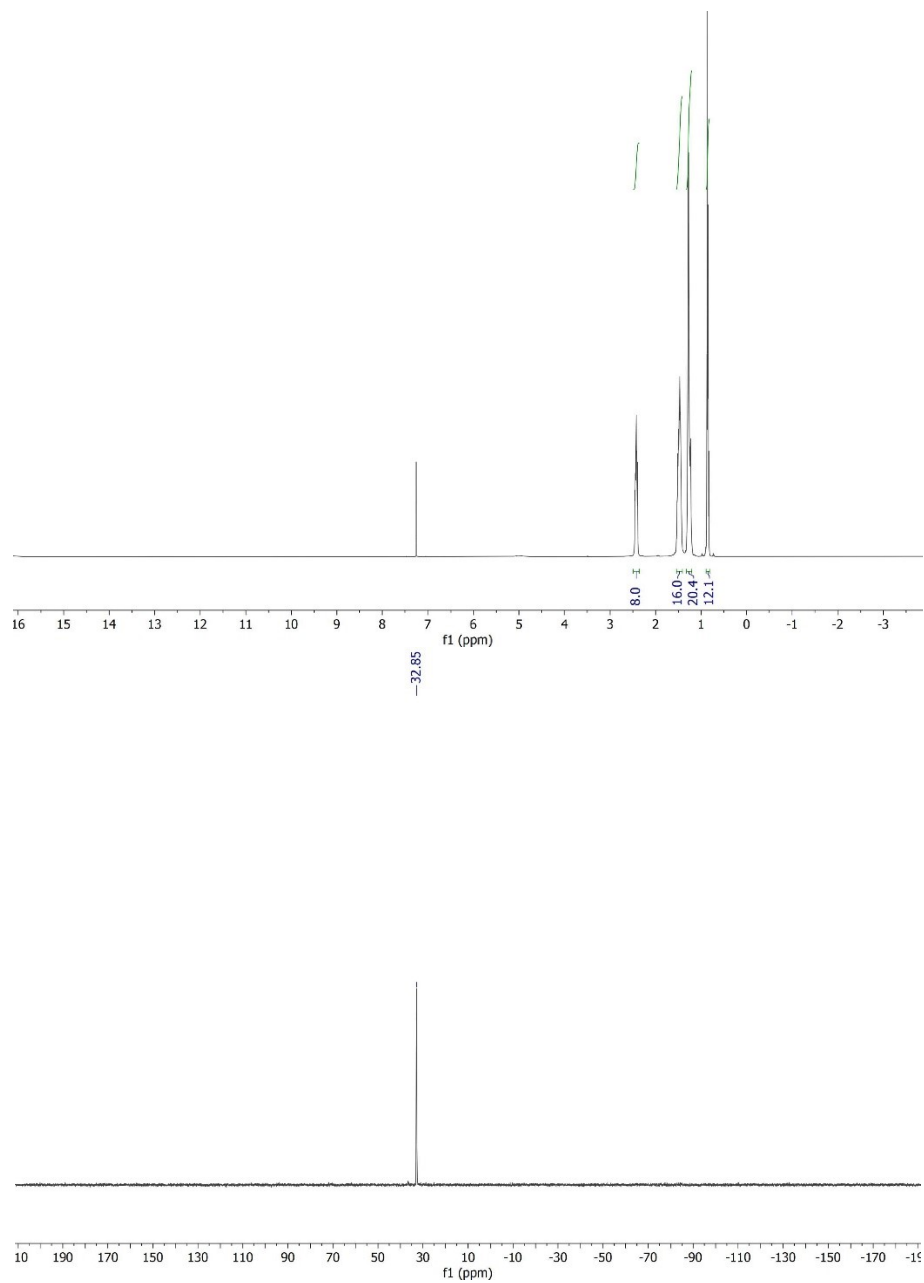

**Fig S2.**  $^1H$  and  $^{31}P$  NMR spectra of TAPIL-2,  $[P(C_6H_{13})_3(C_8H_{17})]Cl$

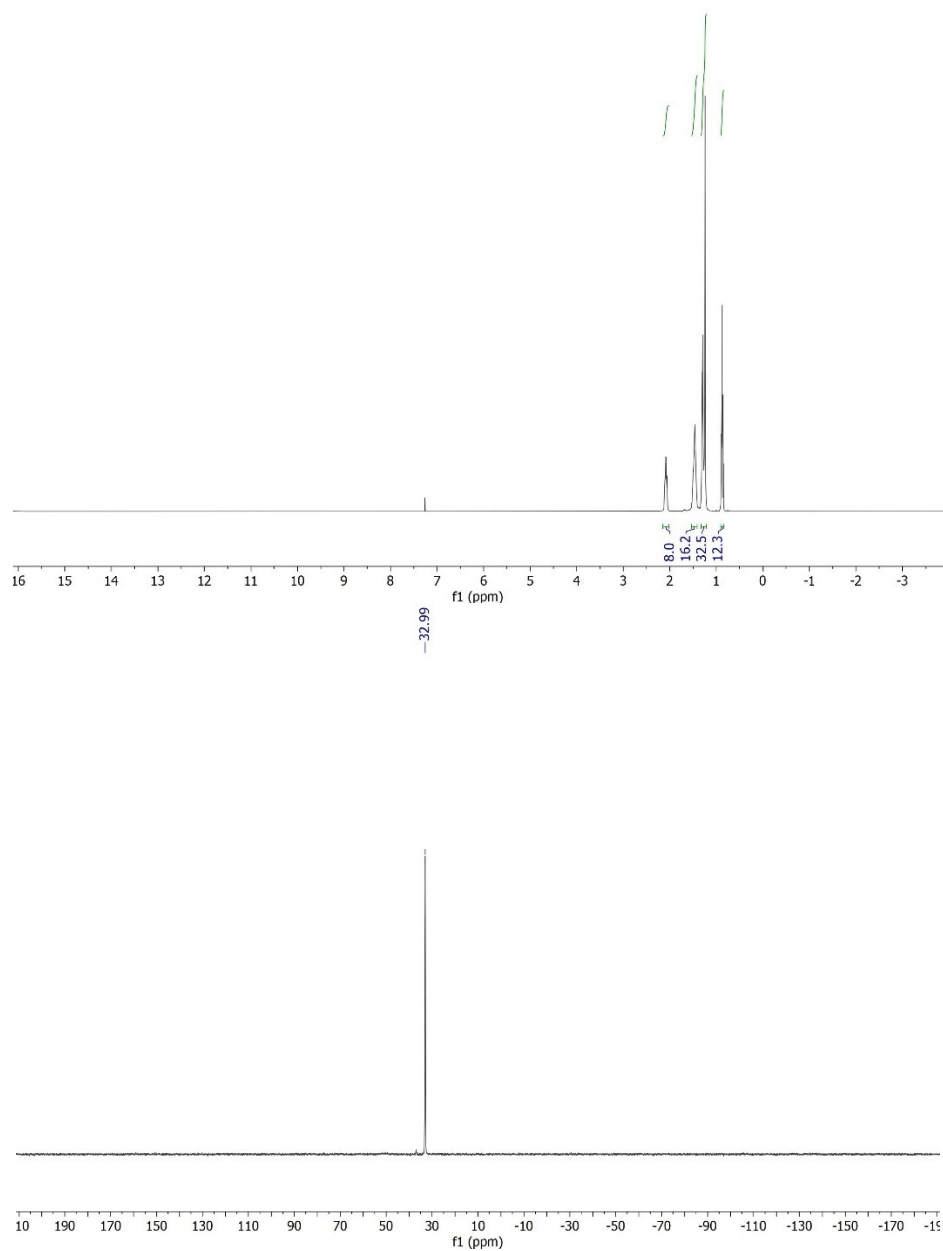

**Fig S3.**  $^1\text{H}$  and  $^{31}\text{P}$  NMR spectra of TAPIL-3,  $[\text{P}(\text{C}_6\text{H}_{13})_3(\text{C}_{14}\text{H}_{29})]\text{NTf}_2$

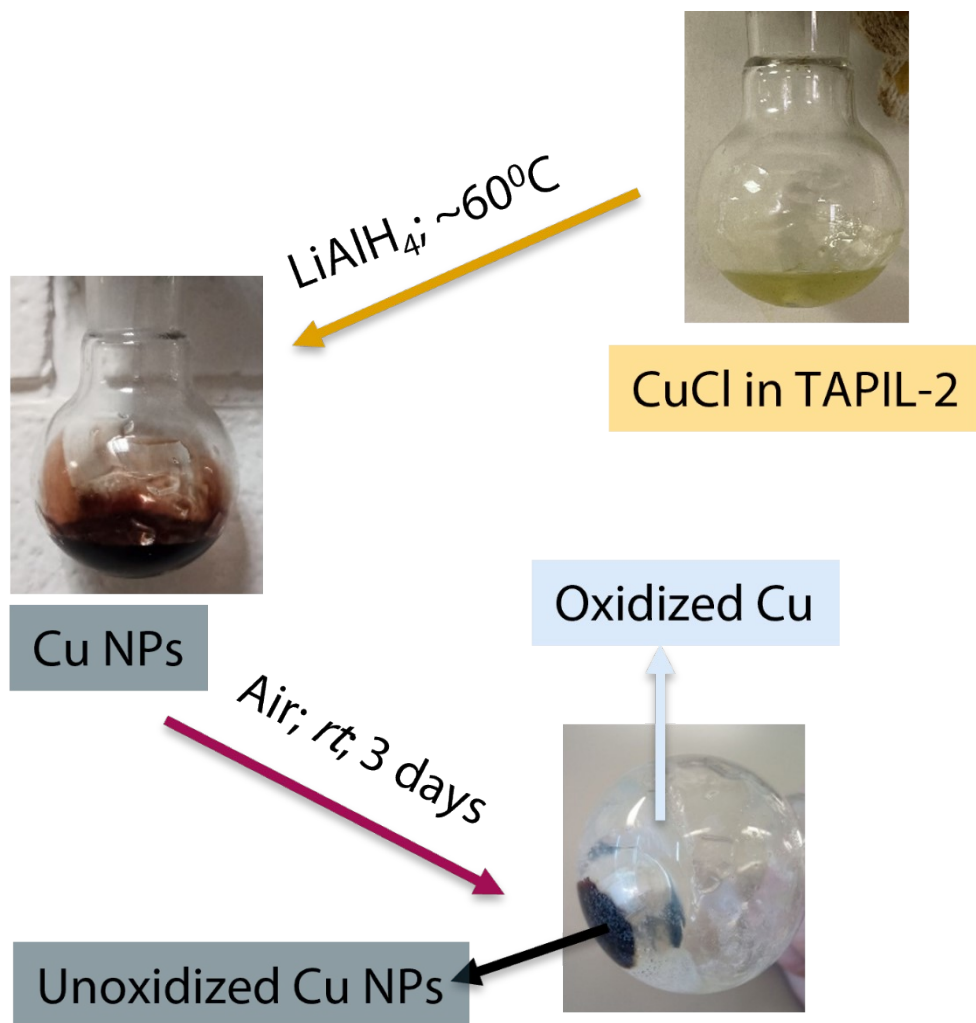

**Fig S4.** Evolution of copper species within **composite-2**: visual inspection.

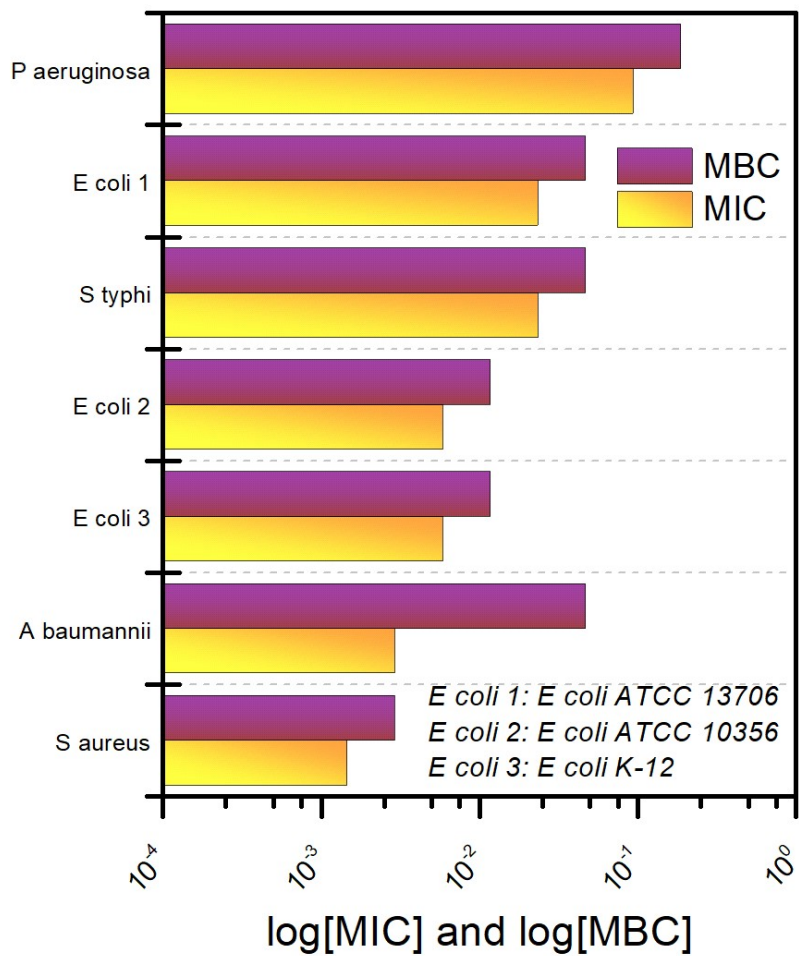

**Fig S5.** Bacterial panel test results for **composite-2** plotted on a log scale; MIC and MBC are in units of  $\mu\text{g.mL}^{-1}$ .

**Table S1.** Time kill assay of *E. coli* and *S. aureus* upon exposure to **composite-2**.

| <i>E. coli</i> | Log of mean viable cells |        |        | Log of reduction (cfu/mL) |        |        |        |
|----------------|--------------------------|--------|--------|---------------------------|--------|--------|--------|
| Time (min)     | 1-Fold                   | 2-Fold | 4-Fold | LogN                      | 1-Fold | 2-Fold | 4-Fold |
| 0              | 4.69                     | 4.95   | 4.86   | 7.32                      | 2.63   | 2.37   | 2.46   |
| 10             | 4.58                     | 4.37   | 4.02   | 7.32                      | 2.74   | 2.95   | 3.30   |
| 20             | 4.33                     | 4.27   | 3.92   | 7.32                      | 2.99   | 3.05   | 3.40   |
| 30             | 4.24                     | 4.22   | 3.78   | 7.32                      | 3.08   | 3.10   | 3.54   |
| 60             | 4.16                     | 4.05   | 3.59   | 7.32                      | 3.16   | 3.27   | 3.73   |
| 90             | 3.97                     | 4.01   | 3.53   | 7.32                      | 3.35   | 3.31   | 3.79   |
| 120            | 3.86                     | 3.91   | 3.44   | 7.32                      | 3.46   | 3.41   | 3.88   |

| <i>S. aureus</i> | Log of mean viable cells |        |        | Log of reduction (cfu/mL) |        |        |        |
|------------------|--------------------------|--------|--------|---------------------------|--------|--------|--------|
| Time (min)       | 1-Fold                   | 2-Fold | 4-Fold | LogN                      | 1-Fold | 2-Fold | 4-Fold |
| 0                | 5.43                     | 5.33   | 6.23   | 7.43                      | 2.00   | 2.10   | 1.20   |
| 10               | 5.29                     | 5.22   | 6.05   | 7.43                      | 2.14   | 2.21   | 1.38   |
| 20               | 5.17                     | 5.09   | 5.95   | 7.43                      | 2.26   | 2.34   | 1.48   |
| 30               | 4.96                     | 4.91   | 5.73   | 7.43                      | 2.47   | 2.52   | 1.70   |
| 60               | 4.92                     | 4.85   | 5.19   | 7.43                      | 2.51   | 2.58   | 2.24   |
| 90               | 4.88                     | 4.85   | 4.41   | 7.43                      | 2.55   | 2.58   | 3.02   |
| 120              | 4.83                     | 4.83   | 4.14   | 7.43                      | 2.60   | 2.60   | 3.29   |

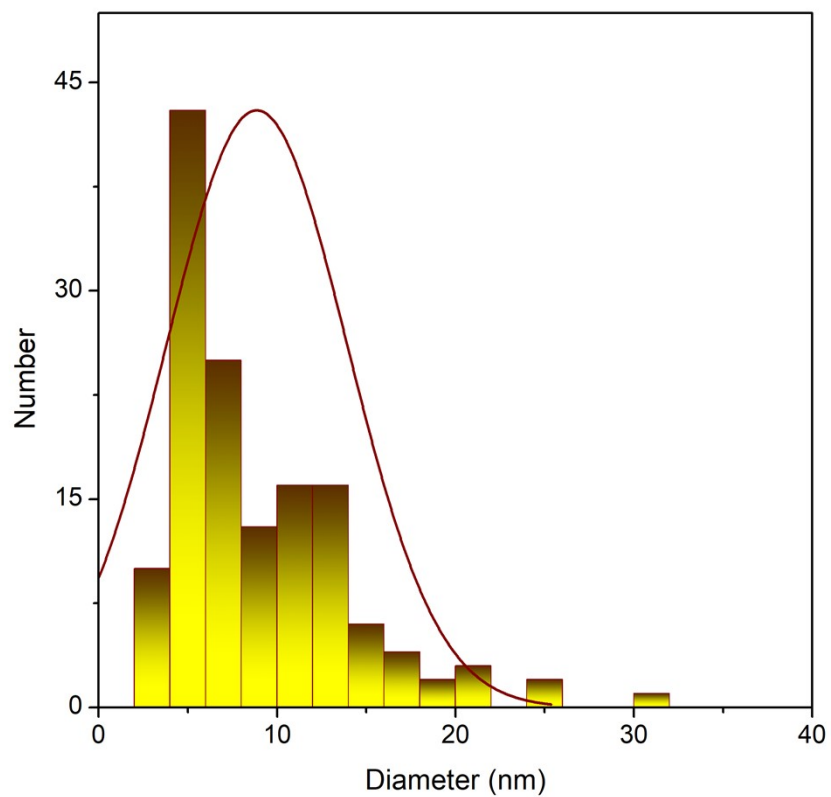

**Fig S6.** Cu NP size distribution profile associated with **Fig. 4(d)**. Rationale for  $r(\text{Cu NP})_{\text{SEM}} \gg r(\text{Cu NP})_{\text{TEM}}$  may be found in Section 3b of the main paper.



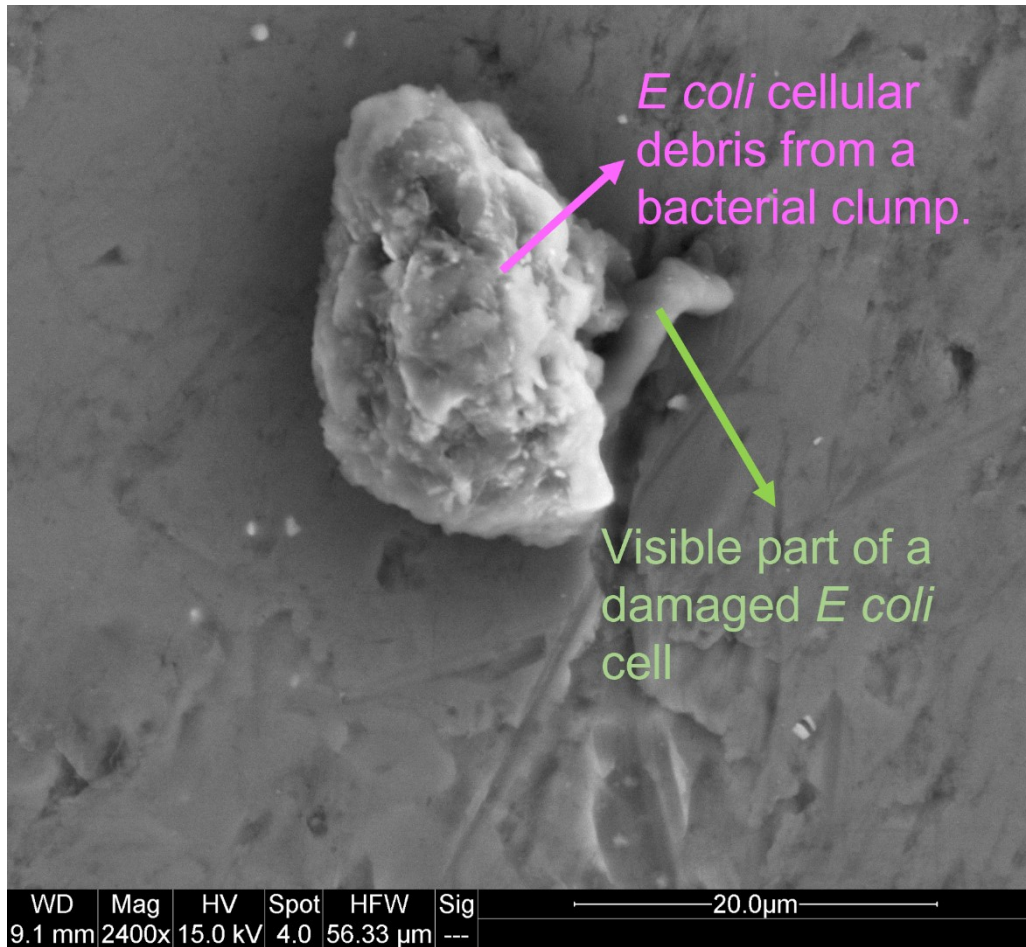

**Fig S7.** The full-sized version of the cropped inset in **Fig. 9(d)** of the main text.
